# Supplementary material
Source: publisher site journal article supplement (https://www.spandidos-publications.com/6035/downloadSupplementary)

Figure S1. Expression of cytohesins in patients with AML based on TCGA dataset. Data was analyzed using one-way ANOVA and Dunnet's post hoc test with CYTH4 expression as the control. \* $P < 0.05$  and \*\*\*\* $P < 0.0001$ . TCGA, The Cancer Genome Atlas; CYTH, cytohesin; AML, acute myeloid leukemia.

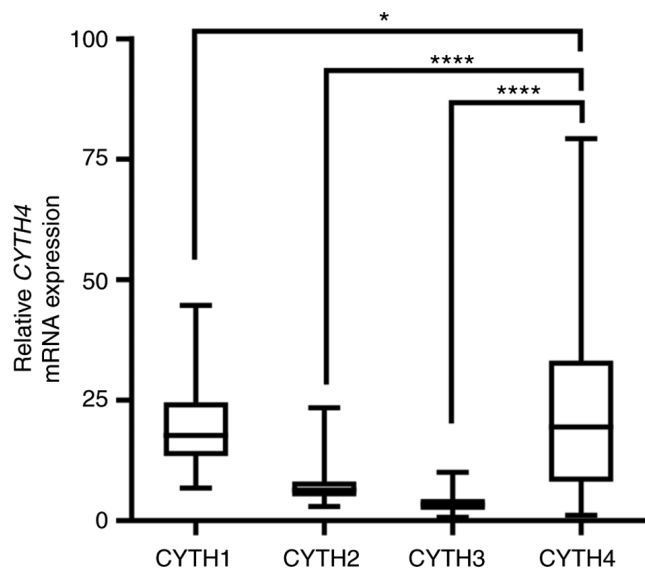

Figure S2. CYTH4 expression in different cancer cell lines based on the HPA dataset. HPA, Human Protein Atlas; CYTH4, cytohesin-4.

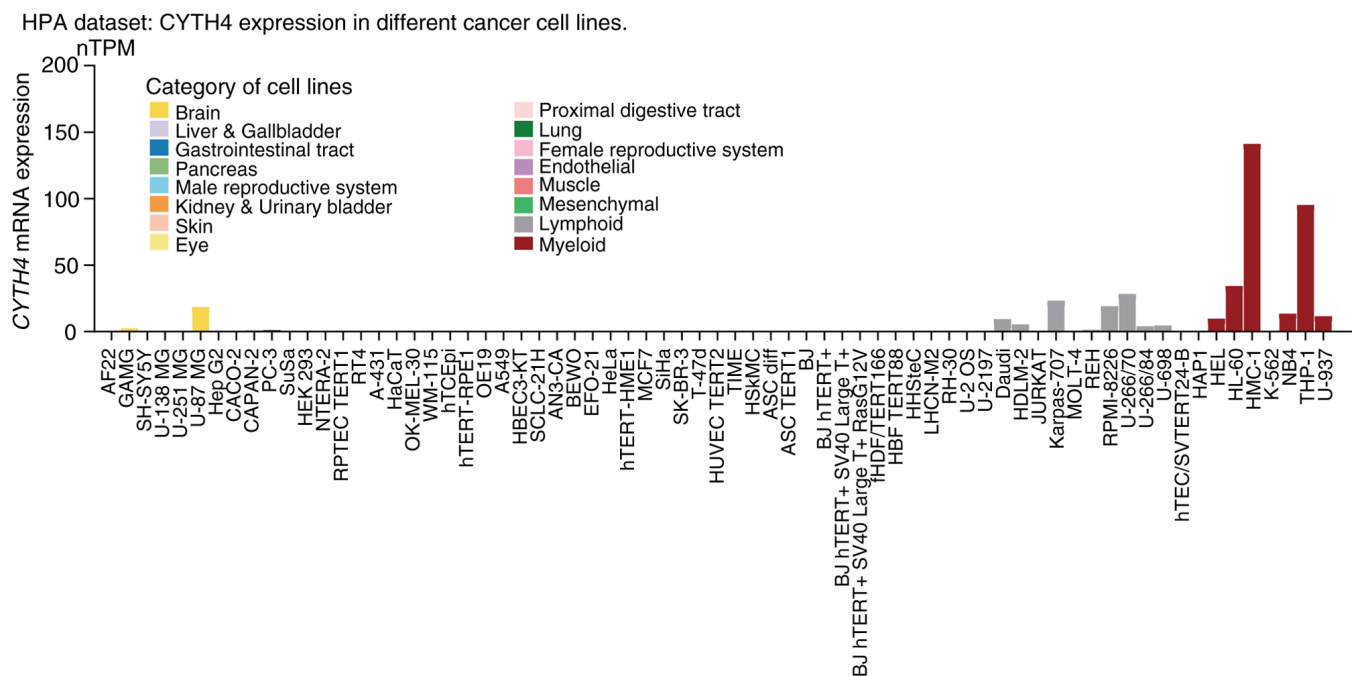

Figure S3. Quantitative PCR showing CYTH4 expression levels in AML cell lines upon shRNA-mediated CYTH4 knockdown. Data were analyzed using one-way ANOVA and Dunnett's post hoc test with CYTH4 expression in scramble cells as the control. Two-sided  $P < 0.05$  was considered to indicate a statistically significant difference. \*\* $P < 0.01$ , \*\*\* $P < 0.001$  and \*\*\*\* $P < 0.0001$ . CYTH4, cytohesin-4; AML, acute myeloid leukemia; shRNA, short hairpin RNA.

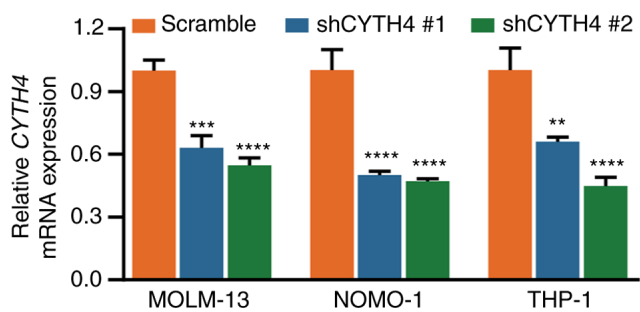

Figure S4. CYTH4 overexpression enhances cell growth. (A) Quantitative PCR and (B) western blot showing overexpression of CYTH4 in AML cell lines after infection with pLV3-CYTH4-puro lentivirus. (C) Cell Counting Kit-8 assay displaying the enhancement of cell growth in CYTH4-overexpressed cells compared with control cells. Two-sided  $P < 0.05$  was considered to indicate a statistically significant difference.  $**P < 0.01$  and  $****P < 0.0001$ . CYTH4, cytohesin-4; AML, acute myeloid leukemia.

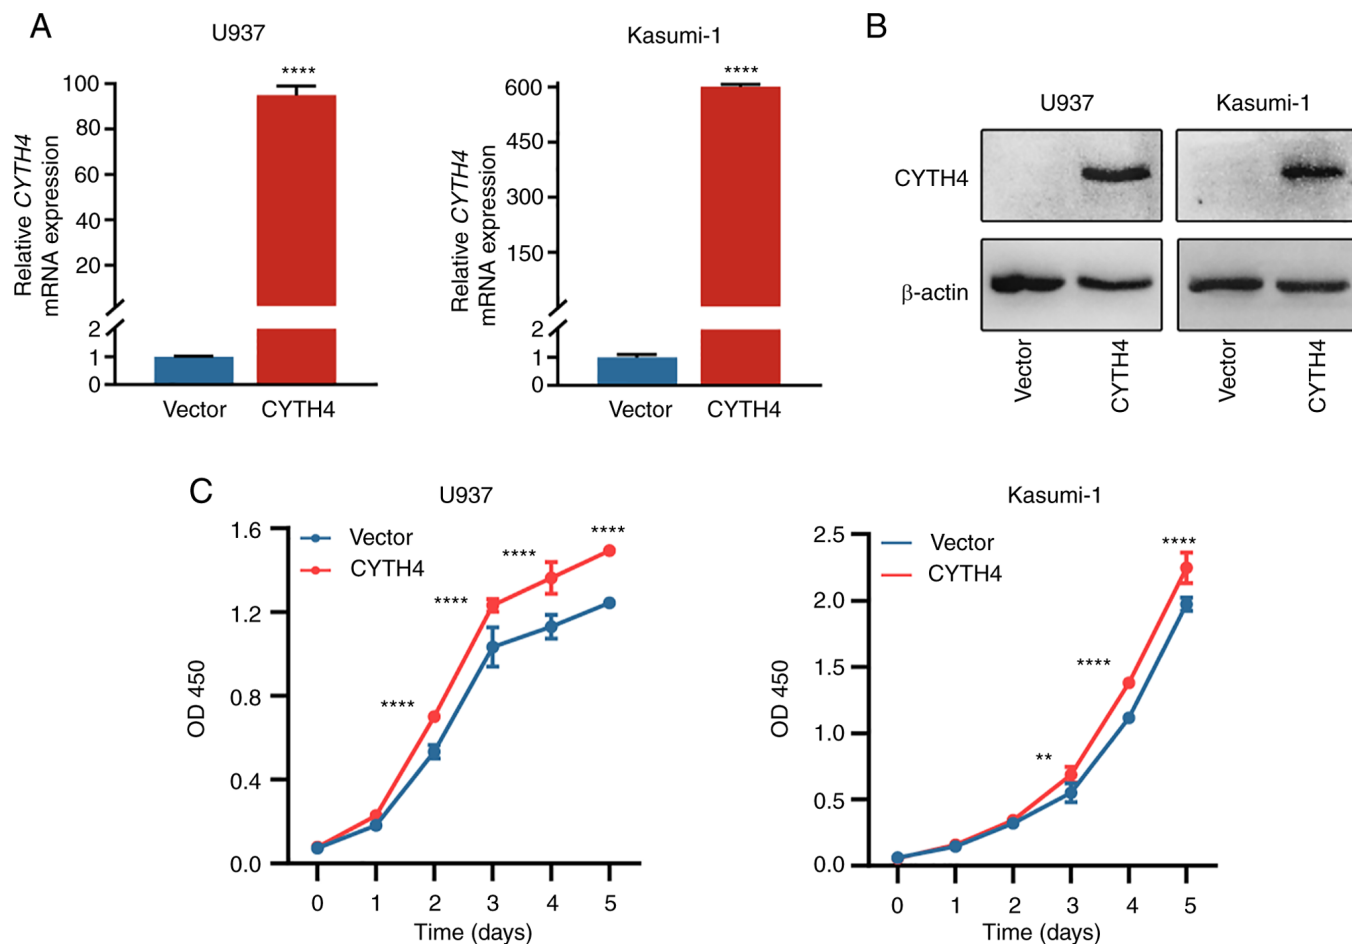

Supplement: Supplementary file 1 [file downloadSupplementary]
